# Supplementary material for: Heterologous Aggregates Promote De Novo Prion Appearance via More than One Mechanism
Source: PLOS journal article supplement (doi:10.1371/journal.pgen.1004814), 2015-01-08

**A**

***[pin<sup>-</sup>][psi<sup>-</sup> RNQ1-CFP***

↑ Sup35NM

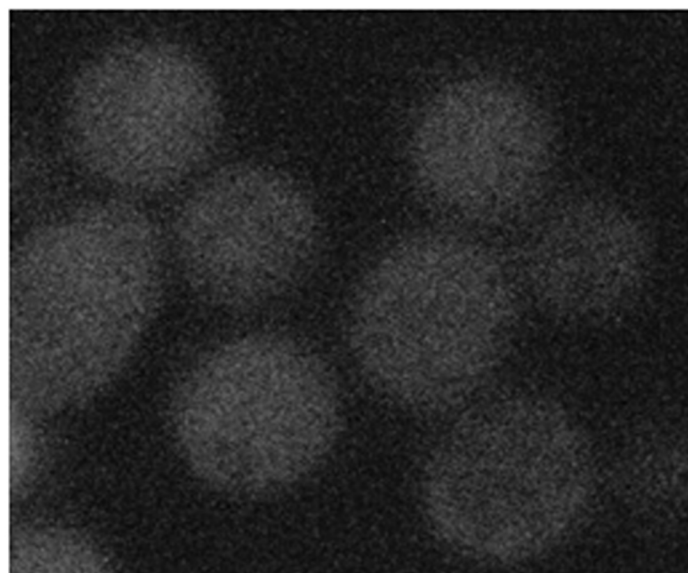

**B**

***[PIN<sup>+</sup>][psi<sup>-</sup> RNQ1-CFP***

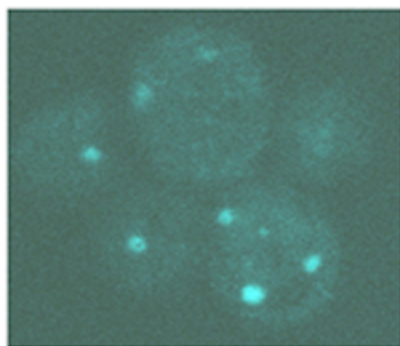

Supplement: S7 (10.1371/journal.pgen.1004814.s007) [file journal.pgen.1004814.s007]
