# Supplementary material for: Heterologous Aggregates Promote De Novo Prion Appearance via More than One Mechanism
Source: PLOS journal article supplement (doi:10.1371/journal.pgen.1004814), 2015-01-08
Supplement: S14 (10.1371/journal.pgen.1004814.s014) [file journal.pgen.1004814.s014]

**Table S2.** Colocalization data of Rnq1-GFP with Sup35-RFP after 6 h of induction of Sup35-RFP in [*PIN*<sup>+</sup>] cells.

|                                                                                    |                                         |
|------------------------------------------------------------------------------------|-----------------------------------------|
| <b>Total number of cells with Sup35-RFP dots (n=6000)</b>                          | <b>242 out of 6000 (4%)<sup>a</sup></b> |
| Total number of cells with colocalizing Rnq1-GFP dots in cells with Sup35-RFP dots | 144 out of 242 (60%)                    |
| Total number of cells with diffuse Rnq1-GFP in cells with Sup35-RFP dots           | 98 out of 242 (40%)                     |

<sup>a</sup>Representative images are provided in Figure 4A.
