# Supplementary material for: Heterologous Aggregates Promote De Novo Prion Appearance via More than One Mechanism
Source: PLOS journal article supplement (doi:10.1371/journal.pgen.1004814), 2015-01-08
Supplement: S20 (10.1371/journal.pgen.1004814.s020) [file journal.pgen.1004814.s020]

**Table S8.** Data for overexpressed Sup35 and Rnq1 from the BiFC constructs Sup35NM-VN and Rnq1-VC, respectively by growing cells in 0.2% Gal<sup>a</sup>.

| <b>Time after addition of 0.2% Gal<br/>(h)</b> | <b>BiFC Fluorescence in<br/>[<i>PIN</i><sup>+</sup>][<i>psi</i><sup>-</sup>] cells</b> | <b>BiFC Fluorescence in<br/>[<i>pin</i><sup>-</sup>][<i>psi</i><sup>-</sup>] cells</b> |
|------------------------------------------------|----------------------------------------------------------------------------------------|----------------------------------------------------------------------------------------|
| 16                                             | 1.8% dots                                                                              | No fluorescence                                                                        |
| 24                                             | 4.0% dots                                                                              | No fluorescence                                                                        |
| 40                                             | 5.6% dots, 0.9% peripheral<br>rings/lines/meshes                                       | No fluorescence                                                                        |

<sup>a</sup>Representative images are provided in Figure S6.
